# Supplementary material
Source: publisher figshare collection journal article supplement (https://gsajournals.figshare.com/ndownloader/files/17706191)
Supplement: Supplementary file 1 [file 17706191]

Class 1	Class 2	Difference	Adjusted p-value
Synonymous	Noncoding	-0.017	8.00E-04
Nonsynonymous	Noncoding	-0.057	0
Deleterious	Noncoding	-0.2	0
Nonsynonymous	Synonymous	-0.054	0
Deleterious	Synonymous	-0.184	0
Deleterious	Nonsynonymous	-0.145	1.00E-07
